# Supplementary material for: Developing a Novel Prosthetic Hand with Wireless Wearable Sensor Technology Based on User Perspectives: A Pilot Study
Source: MDPI journal article supplement (doi:10.3390/s24092765), 2024-04-26
Supplement: s1 [file s1]

**Supplementary Table S1.** Action research arm test (ARAT) score (Total 57)

| Participant | Grasp    |       | Grip       |    | Pinch       |    | Gross motor |    | Total    |       |
|-------------|----------|-------|------------|----|-------------|----|-------------|----|----------|-------|
|             | OH       | NW    | OH         | NW | OH          | NW | OH          | NW | OH       | NW    |
| 1           | 15       | 12    | 12         | 12 | 4           | 3  | 9           | 9  | 71       | 60    |
| 2           | 13       | 14    | 12         | 12 | 6           | 3  | 9           | 9  | 71       | 64    |
| 3           | 15       | 15    | 5          | 12 | 6           | 3  | 9           | 9  | 61       | 66    |
| 4           | 15       | 14    | 12         | 7  | 4           | 3  | 9           | 9  | 71       | 54    |
| 5           | 15       | 14    | 12         | 12 | 3           | 3  | 9           | 9  | 69       | 64    |
| 6           | 15       | 15    | 12         | 12 | 6           | 3  | 9           | 9  | 75       | 66    |
| 7           | 15       | 15    | 12         | 12 | 5           | 3  | 9           | 9  | 73       | 66    |
| 8           | 11       | 15    | 8          | 12 | 6           | 3  | 9           | 9  | 59       | 66    |
| 9           | 15       | 15    | 12         | 12 | 6           | 3  | 9           | 9  | 75       | 66    |
| 10          | 15       | 15    | 12         | 12 | 6           | 3  | 9           | 9  | 75       | 66    |
| Median      | 15       | 15    | 12         | 12 | 6           | 3  | 9           | 9  | 71       | 66    |
| IQR         | 14.5-15  | 14-15 | 11/12/2024 | 12 | 4/6/2024    | 3  | 9           | 9  | 67-75    | 63-66 |
|             | P = 1.00 |       | p = 0.75   |    | ※p = 0.0039 |    | p = 1.00    |    | p = 0.29 |       |

OH: Ottobock hand, NW: Our novel hand, IQR: Interquartile range.

**Supplementary Table S2.** Simple test for evaluating hand function score (Total 100).

| Participant | 1          |          | 2                      |            | 3        |                        | 4              |     | 5         |     |
|-------------|------------|----------|------------------------|------------|----------|------------------------|----------------|-----|-----------|-----|
|             | Five large |          | Six middle-sized balls | Five large |          | Six middle-sized cubes | Six wooden     |     |           |     |
|             | balls      |          |                        | cuboids    |          |                        | circular disks |     |           |     |
|             | OH         | NW       | OH                     | NW         | OH       | NW                     | OH             | NW  | OH        | NW  |
| 1           | 0          | 0        | 0                      | 0          | 0        | 0                      | 0              | 0   | 0         | 0   |
| 2           | 3          | 1        | 2                      | 0          | 1        | 0                      | 1              | 0   | 0         | 0   |
| 3           | 1          | 1        | 2                      | 3          | 0        | 1                      | 0              | 1   | 0         | 1   |
| 4           | 1          | 1        | 1                      | 0          | 0        | 0                      | 0              | 0   | 0         | 0   |
| 5           | 3          | 1        | 0                      | 2          | 0        | 0                      | 0              | 0   | 0         | 1   |
| 6           | 1          | 1        | 2                      | 4          | 0        | 2                      | 0              | 1   | 0         | 2   |
| 7           | 0          | 1        | 0                      | 2          | 0        | 1                      | 0              | 0   | 0         | 2   |
| 8           | 5          | 3        | 4                      | 1          | 1        | 0                      | 2              | 0   | 0         | 0   |
| 9           | 5          | 0        | 0                      | 2          | 1        | 1                      | 0              | 3   | 0         | 3   |
| 10          | 1          | 1        | 1                      | 2          | 0        | 1                      | 0              | 0   | 0         | 0   |
| Median      | 1          | 1        | 1                      | 2          | 0        | 0.5                    | 0              | 0   | 0         | 0.5 |
| IQR         | 0.75-3.5   | 0.75-1.0 | 0-2                    | 0-2.25     | 0-1      | 0-1                    | 0.0-25         | 0-1 | 0         | 0-2 |
|             | p = 0.13   |          | p = 0.57               |            | p = 0.53 |                        | p = 0.81       |     | p = 0.063 |     |

| Participant | 6         |        | 7          |     | 8, 9, 10                       |          | Total    |       |
|-------------|-----------|--------|------------|-----|--------------------------------|----------|----------|-------|
|             | Six small |        | Six pieces |     | Seven metallic circular disks, |          |          |       |
|             | cubes     |        | of clothes |     | Six small balls, eight pins    |          |          |       |
|             | OH        | NW     | OH         | NW  | OH                             | NW       | OH       | NW    |
| 1           | 0         | 0      | 0          | 0   | 0                              | 0        | 0        | 0     |
| 2           | 0         | 0      | 0          | 0   | 0                              | 0        | 7        | 1     |
| 3           | 0         | 0      | 0          | 0   | 0                              | 0        | 3        | 7     |
| 4           | 0         | 0      | 0          | 0   | 0                              | 0        | 2        | 1     |
| 5           | 0         | 1      | 0          | 0   | 0                              | 0        | 3        | 5     |
| 6           | 0         | 2      | 1          | 1   | 0                              | 0        | 4        | 13    |
| 7           | 0         | 1      | 0          | 0   | 0                              | 0        | 0        | 7     |
| 8           | 0         | 0      | 0          | 1   | 0                              | 0        | 12       | 5     |
| 9           | 0         | 6      | 0          | 1   | 0                              | 0        | 6        | 16    |
| 10          | 0         | 0      | 0          | 0   | 0                              | 0        | 2        | 4     |
| Median      | 0         | 0      | 0          | 0.3 | 0                              | 0        | 3        | 5     |
| IQR         | 0         | 0-1.25 | 0.1        | 0-1 | 0                              | 0        | 1.5-6.25 | 1-8.5 |
|             | p = 0.13  |        | p = 0.50   |     | p = 1.00                       | p = 1.00 | p = 0.26 |       |

OH: Ottobock hand, NW: Our novel hand, IQR: Interquartile ranges.

Supplementary Table S3. Borg Scale Change.

| Participant | Borg Scale Change |         |
|-------------|-------------------|---------|
|             | OH                | NW      |
| 1           | 1                 | 0       |
| 2           | 1                 | 0       |
| 3           | 1                 | 0       |
| 4           | 1                 | 1       |
| 5           | 1                 | 2       |
| 6           | 3                 | 1       |
| 7           | 5                 | 2.5     |
| 8           | 1                 | 0       |
| 9           | 4.5               | 2       |
| 10          | 2                 | 3       |
| Median      | 1                 | 1       |
| IQR         | 1-1.375           | 0-2.125 |
|             | ※p = 0.045        |         |

OH: Ottobock hand, NW: Our novel hand, IQR: Interquartile ranges.

### **Supplementary Movie**

The movie shows the functions of pinching, grasping, and gripping. In addition, video clips from a participant performing the 5th STEF (moving six wooden disks) are shown.
